# Supplementary material for: Noncanonical role of singleminded-2s in mitochondrial respiratory chain formation in breast cancer
Source: PubMed Central journal article supplement (PMC10238511; doi:10.1038/s12276-023-00996-0), 2023-05-01

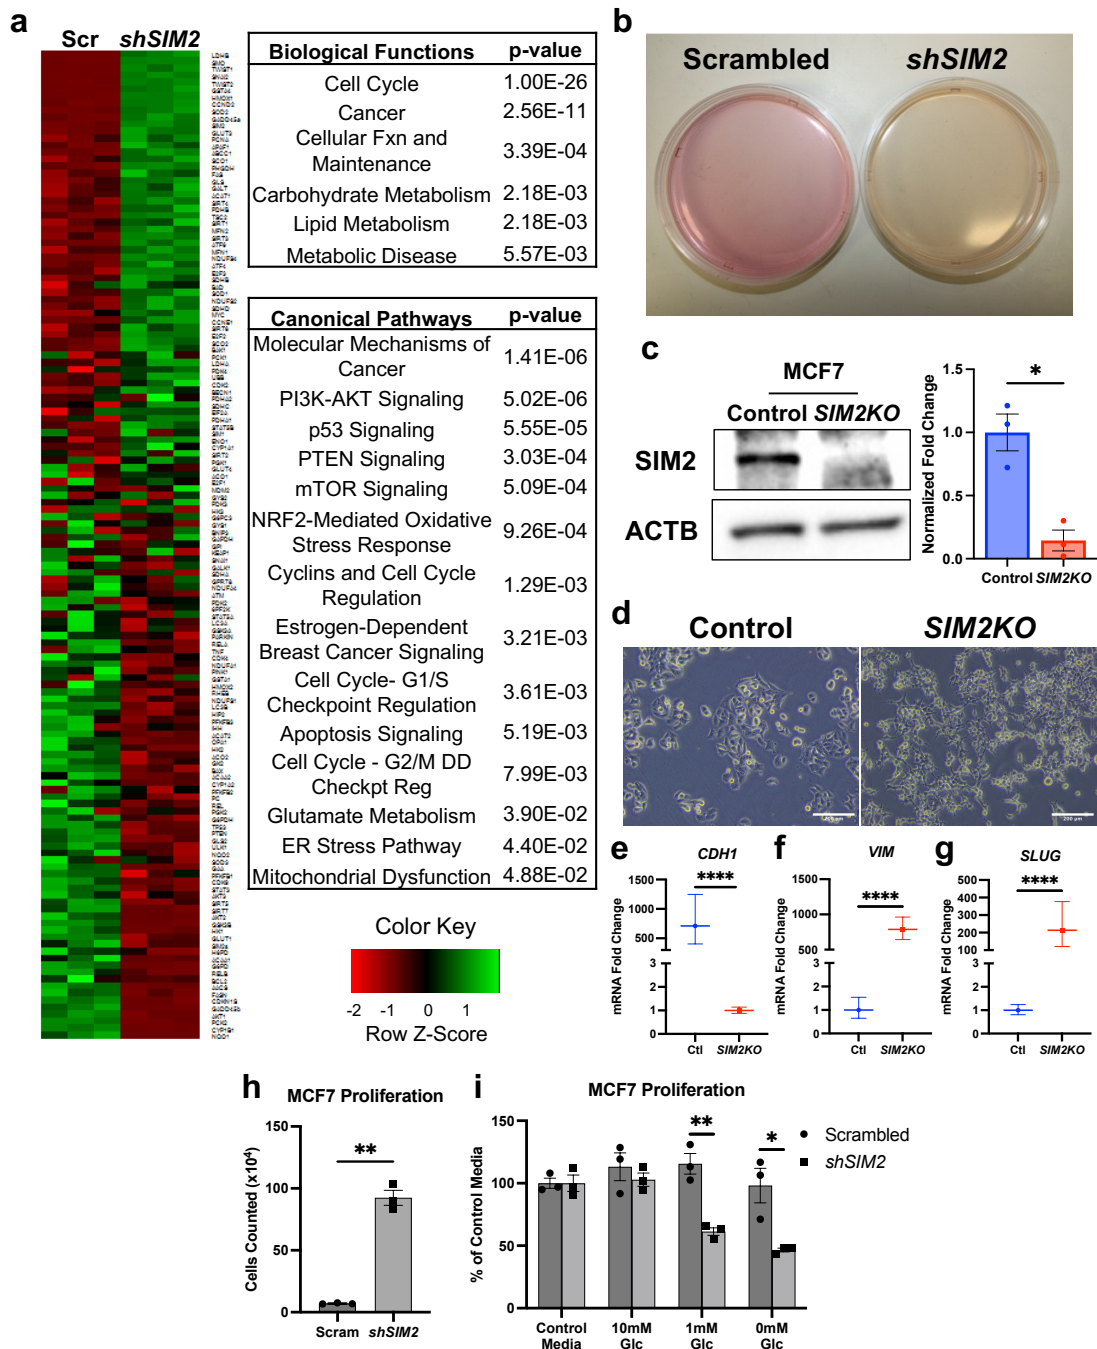

**Supplementary Fig. 1** SIM2 loss leads to EMT and Warburg phenotype. **a** Microarray analysis of MCF7 *shSIM2* cells analyzed with Ingenuity Pathway Analysis. Significantly differentially regulated pathways are shown and have  $P < 0.05$ . **b** Images of culture dishes with MCF7 scrambled control and *shSIM2* cells displaying different media color from changes in pH. **c** Immunoblot of SIM2 in MCF7 control and *SIM2KO* cells. Densitometric analysis were performed using Fiji and fold change of SIM2 normalized to ACTB is plotted showing means  $\pm$  SEM.  $*P < 0.05$ , paired two-tailed *t*-test;  $n = 3$ . **d** Brightfield image taken at 10X of MCF7 control and *SIM2KO* cells. **e-g** Quantitative RT-PCR analysis of MCF7 control and *SIM2KO* cells showing mRNA expression of **e** *CDH1*, **f** *VIM*, and **g** *SLUG*. Data is analyzed by the  $2^{-\Delta\Delta Ct}$  method and error is presented as the transformed sum of squares of SD of the target and reference genes.  $****P < 0.0001$ , two-tailed Student's *t* test of  $\Delta Ct$  values;  $n = 3$  samples. **h** Proliferation assays of MCF7 *shSIM2* cells in normal media. **i** MCF7 *shSIM2* cells were also grown in media containing 10mM, 1mM, and 0mM glucose and growth was represented as a percentage of growth in control media. Cells were counted 3 days after plating and comparisons were made to control cells at the given conditions. Data are presented as means  $\pm$  SEM.  $*P < 0.05$ ,  $**P < 0.01$ ,  $****P < 0.0001$ , two-tailed Student's *t* test;  $n = 3$  samples.

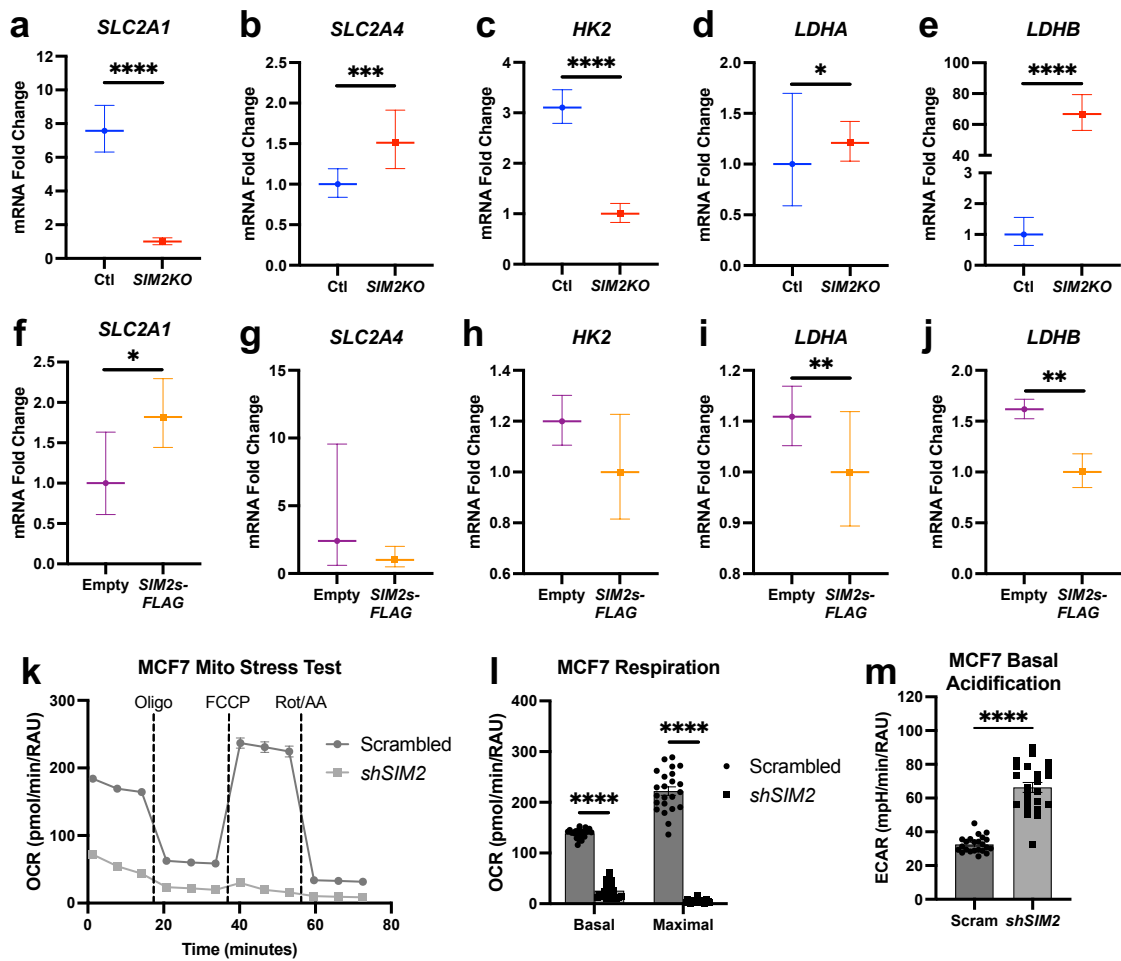

**Supplementary Fig. 2** Glycolytic genes are not regulated by SIM2. **a-j** Quantitative RT-PCR analysis of **a-e** MCF7 *SIM2KO* and **f-j** SUM159 *SIM2s-FLAG* cells showing relative mRNA expression of *SLC2A1*, *SLC2A4*, *HK2*, *LDHA*, and *LDHB*. Data is analyzed by the  $2^{-\Delta\Delta C_t}$  method and error is presented as the transformed sum of squares of SD of the target and reference genes. \* $P < 0.05$ , \*\* $P < 0.01$ , \*\*\* $P < 0.001$ , \*\*\*\* $P < 0.0001$ , two-tailed Student's *t* test of  $\Delta C_t$  values;  $n = 3$  samples. **k-m** Mitochondrial stress test was performed using Seahorse XF Extracellular Flux Analyzer on MCF7 *shSIM2*. **k** Oxygen consumption rates (OCR) were plotted through the experiment. **l** OCR after rotenone/antimycin-A treatment was subtracted the third measurement and seventh measurement to obtain basal and maximal respiration rates, respectively. **m** Basal extracellular acidification rates (ECAR) were measured. Data are plotted as mean  $\pm$  SEM. \*\*\*\* $P < 0.0001$ , two-tailed Student's *t* test;  $n = 23$ .

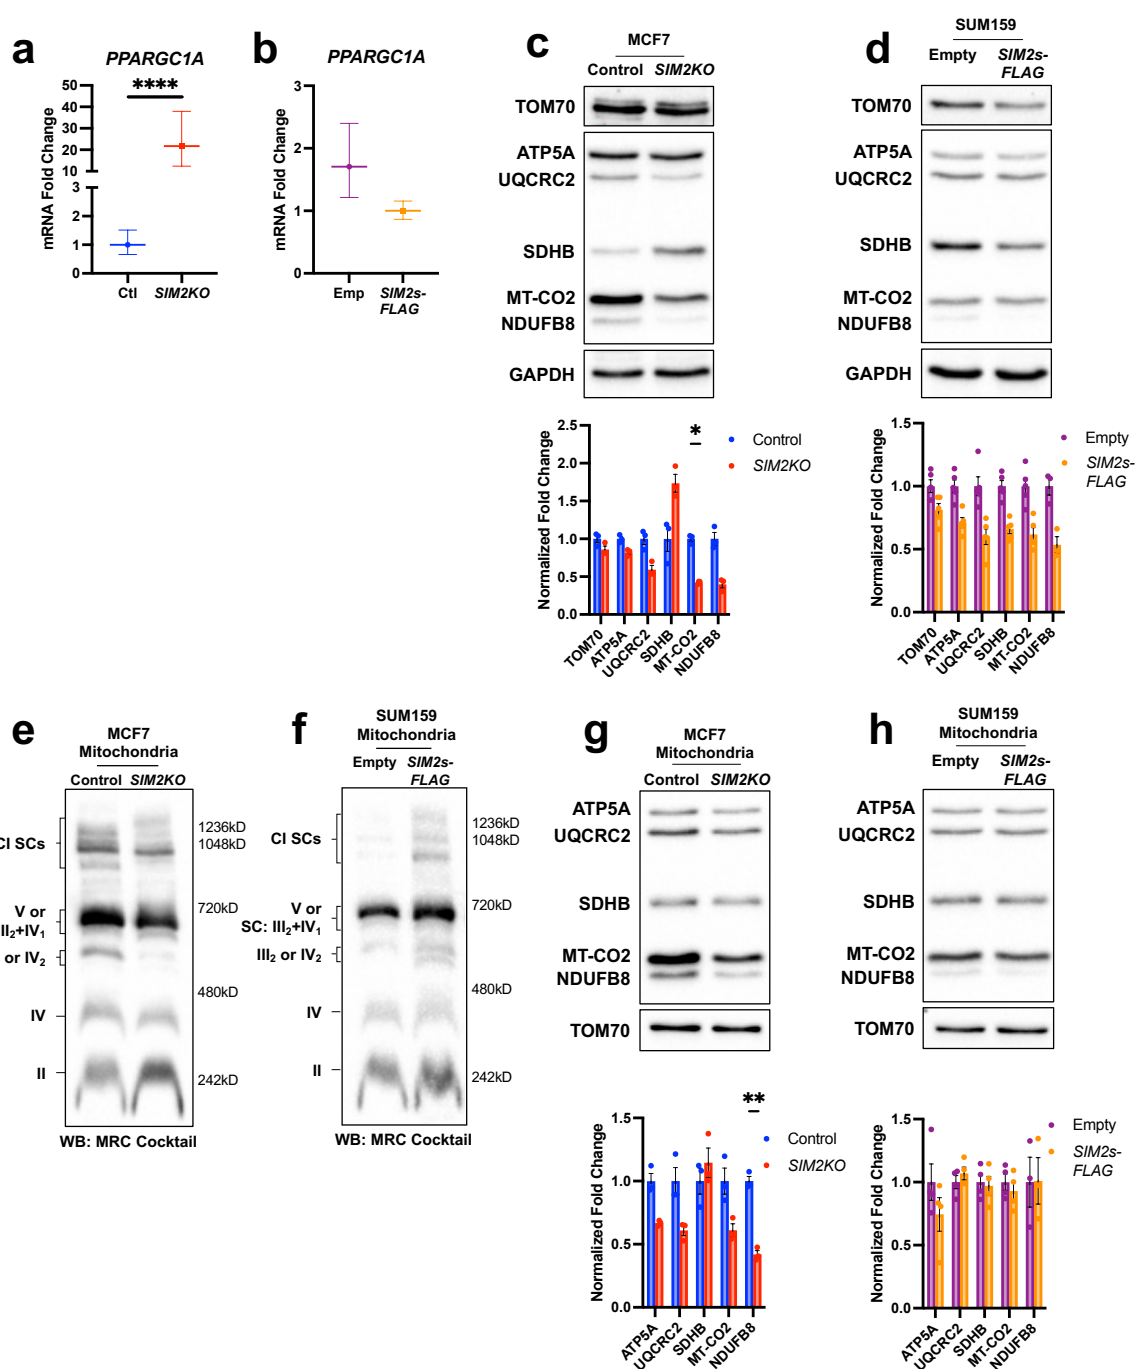

**Supplementary Fig. 3** Mitochondrial protein expression is not correlated with SIM2 expression. **a-b** Quantitative RT-PCR analysis of **a** MCF7 *SIM2KO* and **b** SUM159 *SIM2s-FLAG* cells showing relative mRNA expression of *PPARGC1A*. Data is analyzed by the  $2^{-\Delta\Delta Ct}$  method and error is presented as the transformed sum of squares of SD of the target and reference genes. \*\*\*\**P* < 0.0001, two-tailed Student's *t* test of  $\Delta Ct$  values; *n* = 3 samples. Protein from **c** MCF7 *SIM2KO* and **d** SUM159 *SIM2s-FLAG* was analyzed by immunoblot using the Total OXPHOS cocktail (ATP5A, UQCRC2, SDHB, MT-CO2, NDUFB8), TOM70, and GAPDH antibodies. Densitometric analysis were performed using Fiji and fold change of each protein normalized to GAPDH is plotted showing means  $\pm$  SEM. \**P* < 0.05, paired two-tailed *t*-test; *n*  $\geq$  3. **e,f** Mitochondrial proteins from **e** MCF7 *SIM2KO* cells and **f** SUM159 *SIM2s-FLAG* cells were solubilized with 1:8 protein to digitonin and underwent BN-PAGE followed by immunoblot analysis using the Total OXPHOS cocktail antibody. Mitochondrial protein from **g** MCF7 *SIM2KO* and **h** SUM159 *SIM2s-FLAG* was analyzed by immunoblot using Total OXPHOS cocktail and TOM70 antibodies. Densitometric analysis were performed using Fiji and fold change of each protein normalized to GAPDH is plotted showing means  $\pm$  SEM. \**P* < 0.05, paired two-tailed *t*-test; *n*  $\geq$  3.

**Supplementary Table 1** List of mitochondrial proteins found to interact with SIM2.

| <b>Gene Name</b> | <b>Protein</b>                                                            | <b># of Peptides</b> |
|------------------|---------------------------------------------------------------------------|----------------------|
| HSPA1A           | Heat shock 70kDa protein 1A                                               | 7                    |
| HADHB            | Isoform 2 of trifunctional enzyme subunit beta, mitochondrial             | 6                    |
| GOT2             | Aspartate aminotransferase, mitochondrial                                 | 5                    |
| ACADVL           | Very long-chain specific acyl-CoA dehydrogenase, mitochondrial            | 5                    |
| RACK1            | Receptor of activated protein C kinase                                    | 4                    |
| DECR1            | Isoform 2 of 2,4-dienoyl-CoA reductase, mitochondrial                     | 3                    |
| SQRDL            | Sulfide:quinone oxidoreductase, mitochondrial                             | 2                    |
| NDUFB10          | Isoform 2 of NADH dehydrogenase [ubiquinone] 1 beta subcomplex subunit 10 | 2                    |

## Supplementary Methods

### Gene Expression Microarray Analysis

The Whole Human Genome CodeLink Bioarray (Applied Microarrays) was used to determine differential gene expression between scrambled and *shSIM2* MCF7 breast cancer cells. Sample preparation and hybridization were performed according to the manufacturer's protocols and as previously described<sup>38</sup>. RNA samples were confirmed for loss of *SIM2s* expression via qPCR prior to microarray analysis. Raw microarray data were initially normalized and analyzed using CodeLink Expression Analysis Software version 4.1.0.29054 (GE Healthcare). A median normalization method was used, with a 20% threshold trim percentage. Microarray data were analyzed, and functionally analyses were generated through the use of Ingenuity Pathways Analysis (Ingenuity Systems). A data set containing gene identifiers and corresponding expression values was uploaded into the application. The identifiers were mapped to their corresponding objects in Ingenuity's Knowledge Base. A *P* value cutoff of 0.05 was set to identify the expression of which pathway was significantly differentially regulated. These molecules were integrated into a molecular network developed from information in Ingenuity's Knowledge Base. The data were then analyzed for the biological functions and/or diseases that were most significant. The data discussed in this publication have been deposited in NCBI's Gene Expression Omnibus and are accessible through GEO Series accession number GSE44187<sup>39</sup>.

### High Pressure Liquid Chromatography Mass Spectrophotometry

SUM159 pLPCX Empty control and *SIM2s-FLAG* samples were prepared by following the Co-immunoprecipitation until the addition of  $\beta$ -mercaptoethanol. The samples were further prepared using S-Trap micro spin columns (Protifi). The samples were then analyzed by capillary HPLC-electrospray ionization tandem mass spectrometry on an Orbitrap Velos Pro mass spectrometer (Thermo Fisher) fitted with a New Objective Digital PicoView 550 NanoESI

source. On-line HPLC separation was accomplished with an Eksigent/AB Sciex NanoLC-Ultra 2-D HPLC system: column, PicoFrit™ (New Objective; 75 µm i.d.) packed to 15 cm with C18 adsorbent (Vydac; 218MS 5 µm, 300 Å); mobile phase A, 0.5% acetic acid (HAc)/0.005% trifluoroacetic acid (TFA); mobile phase B, 90% acetonitrile/0.5% HAc/0.005% TFA; gradient 2 to 42% B in 30 min; flow rate, 0.4 µl/min. MS conditions were: ESI voltage, 2.75 kV; MS1 scan range, m/z 300 - 2000; isolation window for MS/MS, 3; normalized collision energy, 30%; scan strategy, survey scan followed by acquisition of data dependent collision-induced dissociation (CID) spectra of the six most intense ions in the survey scan above a threshold of 3000; dynamic exclusion, 30 sec; no charge state screening; reject list of background ions ( $\pm$  10 ppm). Mascot (Matrix Science, version 2.5.1) was used to search the spectra against a combination of the following databases: UniProt\_Human\_20161004 (92,910 sequences; 36,855,958 residues); common contaminants (247 sequences; 12,813 residues). Peptide tolerance was 20 ppm, fragment tolerance, 0.8 Da. Cysteine carbamidomethylation was set as a fixed modification and methionine oxidation, deamidation of glutamine and asparagine and protein N-terminal acetylation were considered as variable modifications; trypsin was specified as the proteolytic enzyme, with one missed cleavage allowed. Subset searches of the identified proteins by X! Tandem [CYCLONE (2010.12.01.1)], cross-correlation with the Mascot results and determination of protein and peptide identity probabilities were accomplished by Scaffold (Proteome Software, version 4.7.1). The thresholds for acceptance of peptide and protein assignments in Scaffold were 95% and 99%, respectively with a minimum of two peptide required, resulting in a protein-level FDR of 0%

**Supplementary Table 2** Details of antibodies used in experiments.

| <b>Immunoblot Antibodies</b>         | <b>Source</b>         | <b>Cat. No.</b> | <b>Dilution</b> |
|--------------------------------------|-----------------------|-----------------|-----------------|
| SIM2                                 | Abcam                 | ab131161        | 1:1000          |
| SIM2 (BNPAGE and CoIP)               | Aviva Systems Biology | ARP38551_P050   | 1:500           |
| Beta-Actin                           | Cell Signaling        | 3700            | 1:2000          |
| Total Oxphos Human Cocktail          | Abcam                 | ab110411        | 1:250           |
| TOM70                                | Proteintech           | 14528-1-AP      | 1:1000          |
| NDUFS2                               | Abcam                 | ab110249        | 1:1000          |
| UQCRC2                               | Abcam                 | ab14745         | 1:1000          |
| UQCRFS1                              | Abcam                 | ab14746         | 1:1000          |
| MT-CO2                               | Abcam                 | ab110258        | 1:1000          |
| Alpha-tubulin                        | Santa Cruz            | sc8035          | 1:200           |
| PARP1                                | Cell Signaling        | 9542            | 1:1000          |
| VDAC1                                | Abcam                 | ab14734         | 1:1000          |
| NDUFB10                              | Invitrogen            | MA5-26082       | 1:500           |
| OPA1                                 | BD Biosciences        | 612607          | 1:1000          |
| DRP1                                 | Millipore             | ABT155          | 1:1000          |
| pDRP1(S673)                          | Cell Signaling        | 4867S           | 1:1000          |
| LDHA                                 | Proteintech           | 21799-1-AP      | 1:500           |
| MDH1                                 | Proteintech           | 15904-1-AP      | 1:5000          |
| PDH                                  | Cell Signaling        | 3205P           | 1:1000          |
| OGDH                                 | Proteintech           | 15212-1-AP      | 1:5000          |
| Anti-Mouse HRP (Secondary)           | Cell Signaling        | 7076            | 1:5000          |
| Anti-Rabbit HRP (Secondary)          | Cell Signaling        | 7074            | 1:5000          |
| <b>Proximity Ligation Antibodies</b> | <b>Source</b>         | <b>Cat. No.</b> | <b>Dilution</b> |
| FLAG                                 | Cell Signaling        | 14793           | 1:800           |
| NDUFB10                              | Invitrogen            | MA5-26082       | 1:100           |
| UQCRC2                               | Abcam                 | ab14745         | 1:2000          |
| MT-CO2                               | Abcam                 | ab110258        | 1:500           |

**Supplementary Table 3** Primer sequences used for qRT-PCR analysis.

| <b>Primer Pair</b> | <b>Forward 5'-3'</b>      | <b>Reverse 5'-3'</b>        |
|--------------------|---------------------------|-----------------------------|
| <i>CDH1</i>        | CACAGACGCGGACGATGAT       | GATCTTGGCTGAGGATGGTGTA      |
| <i>ESR1</i>        | TCTGCCAAGGAGACTCGCTACT    | CGTTATGTCCTTGAATACTTCTCTTGA |
| <i>VIM</i>         | TTCTCTGCCTCTTCCAAACTTTTC  | GGGTATCAACCAGAGGGGAGTGA     |
| <i>SLUG</i>        | GGCTGGCCAAACATAAGCA       | CCTTGTCACAGTATTTACAGCTGAAAG |
| <i>SLC2A1</i>      | CAGCTGACGTGACCCATGAC      | CCTTCTTCTCCCGCATCATC        |
| <i>SLC2A4</i>      | GCTTCGTGGCATTITTTTGA      | ACGTCGGCCACGATGAAC          |
| <i>HK2</i>         | GCATCTTTGAAACCAAGTTCTTGTC | GGTGCTCTCAAGCCCTAAGTGT      |
| <i>LDHA</i>        | AAATTGAAGGGAGAGATGATGGAT  | AGTTACATTATAGTCTTTGCCAGAGA  |
| <i>LDHB</i>        | GGGAACATGGCGACTCAAGT      | GAGAAACACCTGCCACATTAC       |
| <i>PPARGC1A</i>    | TGTCACCACCCAAATCCTTATTT   | TGTGTCGAGAAAAGGACCTTGA      |
| <i>NDUFB10</i>     | TACCAGGACCGCTATCAGGA      | CGGCCTCTTTTGCAGCTTTT        |
| <i>COX7A2L</i>     | GCCTGCCTGACCAAATGC        | GGGCGATCAGGCAGT             |
| <i>SCO2</i>        | CTTCACTCACTGCCCTGACA      | TGAGCAGGTAGATGGCAATG        |
| <i>OPA1</i>        | GTGGTTGGAGATCAGAGTGCTG    | GAGGACCTTCACTCAGAGTCAC      |
| <i>DNM1L</i>       | GATGCCATAGTTGAAGTGGTGAC   | CCACAAGCATCAGCAAAGTCTGG     |
| <i>MDH2</i>        | GGAGTGGCCGCAGATCTG        | TCAGGTCCGAGGTAGCCTTTC       |
| <i>GAPDH</i>       | CCAGGTGGTCTCCTCTGACTTC    | GTGGTCGTTGAGGGCAATG         |
| <i>TBP</i>         | TGCACAGGAGCCAACAGTGAA     | CACATCACAGCTCCCCACCA        |
| <i>ACTB</i>        | GTTTGAGACCTTCAACACCCC     | GTGGCCATCTCTTGCTCGAAGTC     |



Supplemental Figure 1c

Legend  
M7: MCF7  
MKO: MCF7 *SIM2*KO

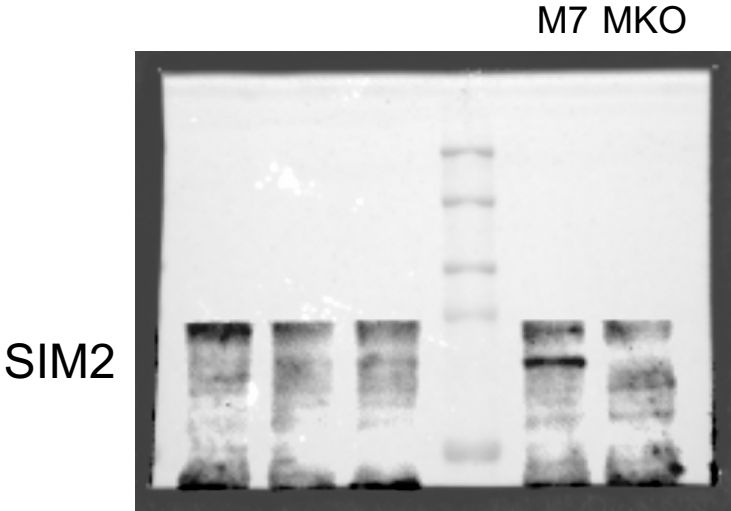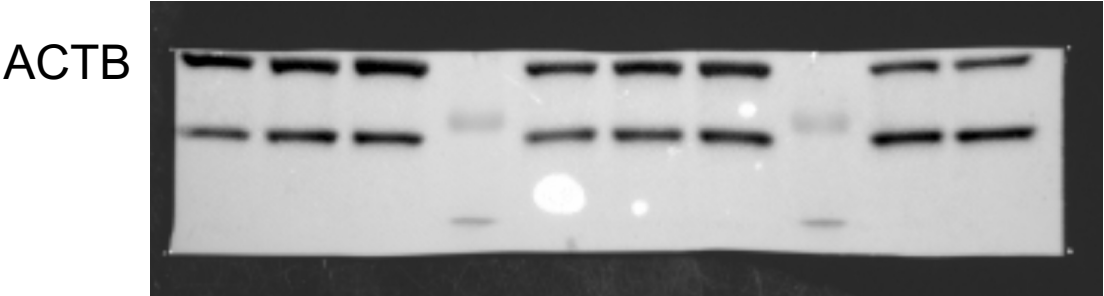

# Supplemental Figure 3c

Legend  
M7: MCF7  
MKO: MCF7 *SIM2KO*

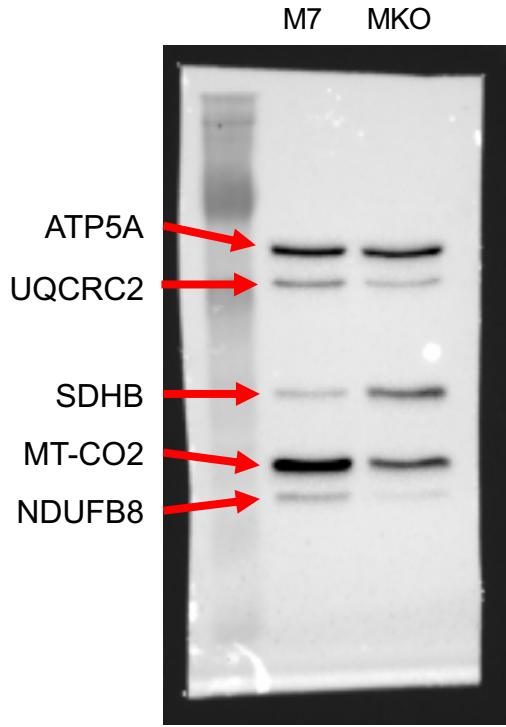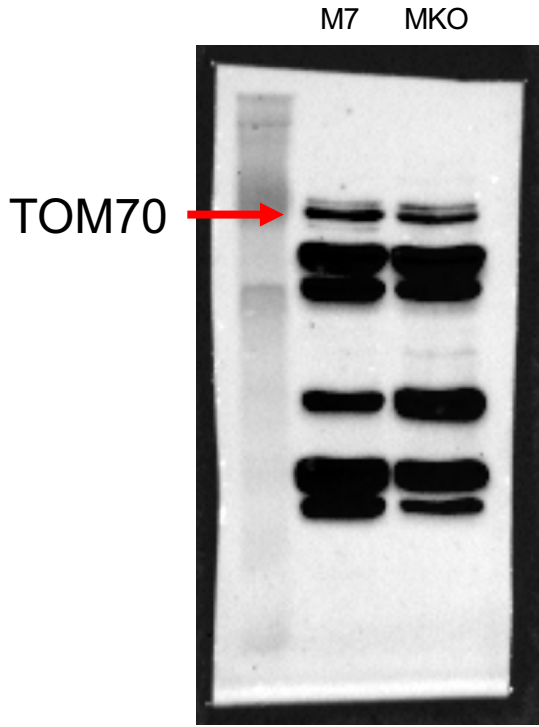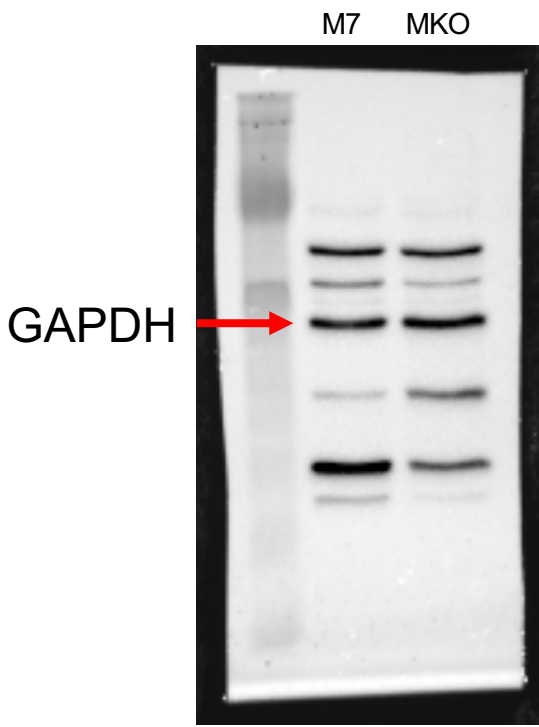

# Supplemental Figure 3d,g,h

**Legend**  
M7: MCF7  
MKO: MCF7 *SIM2KO*  
SE: SUM159 *Empty*  
SO: SUM159 *SIM2s-FLAG*

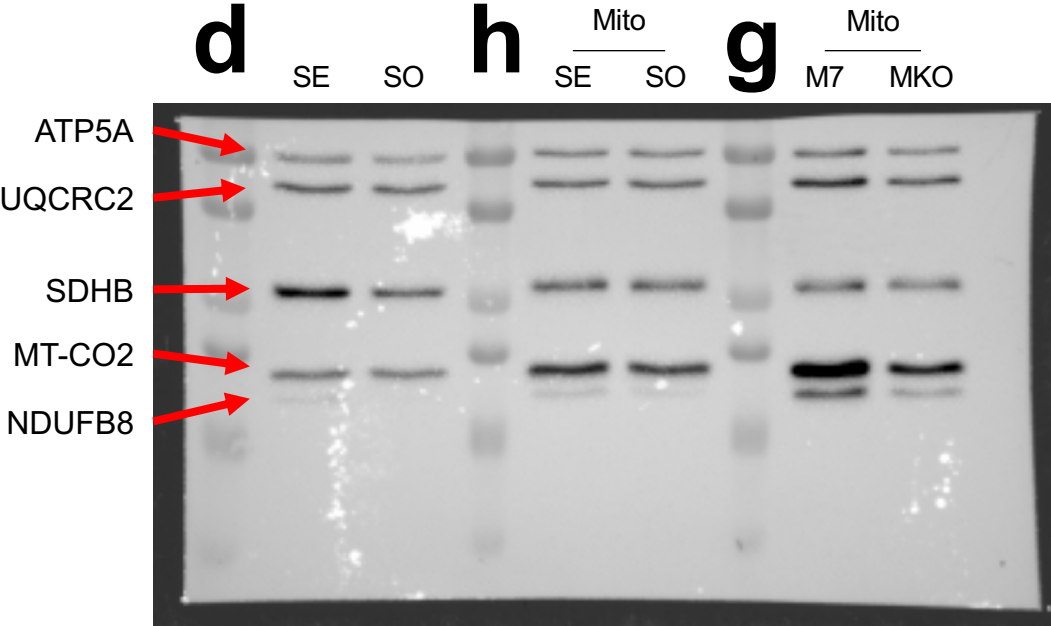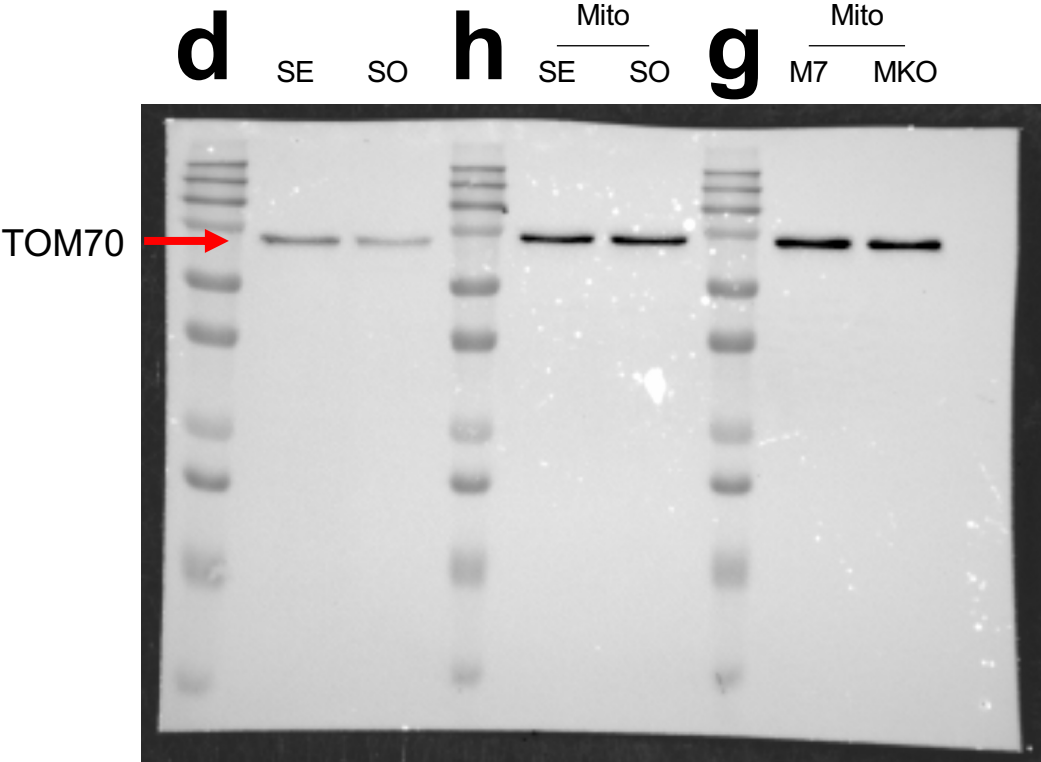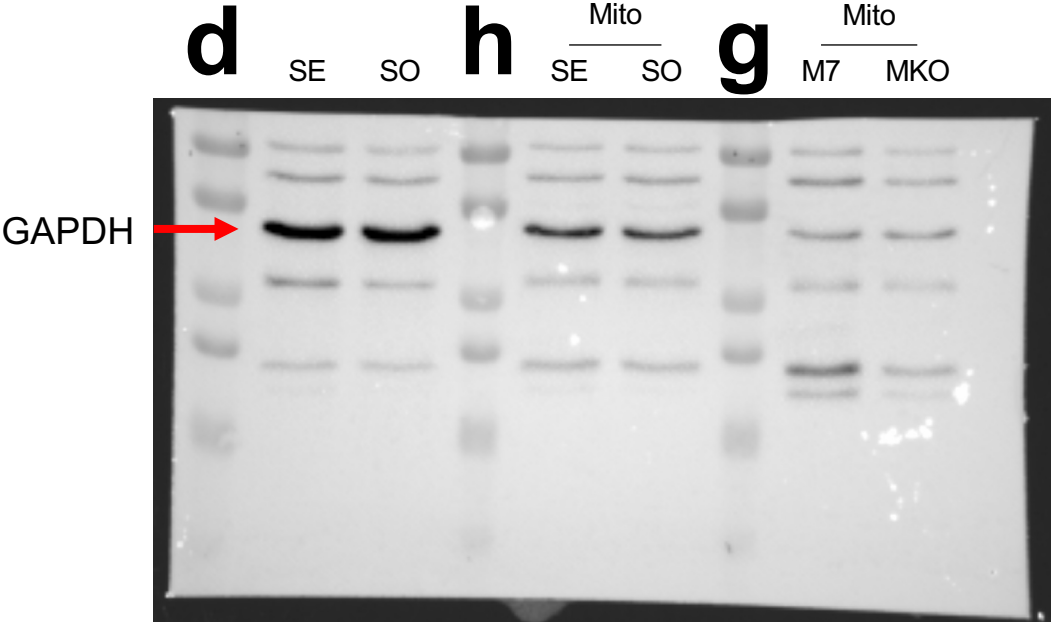

## Supplemental Figure 3e,f

### Legend

M7: MCF7

MKO: MCF7 *SIM2KO*

SE: SUM159 *Empty*

SO: SUM159 *SIM2s-FLAG*

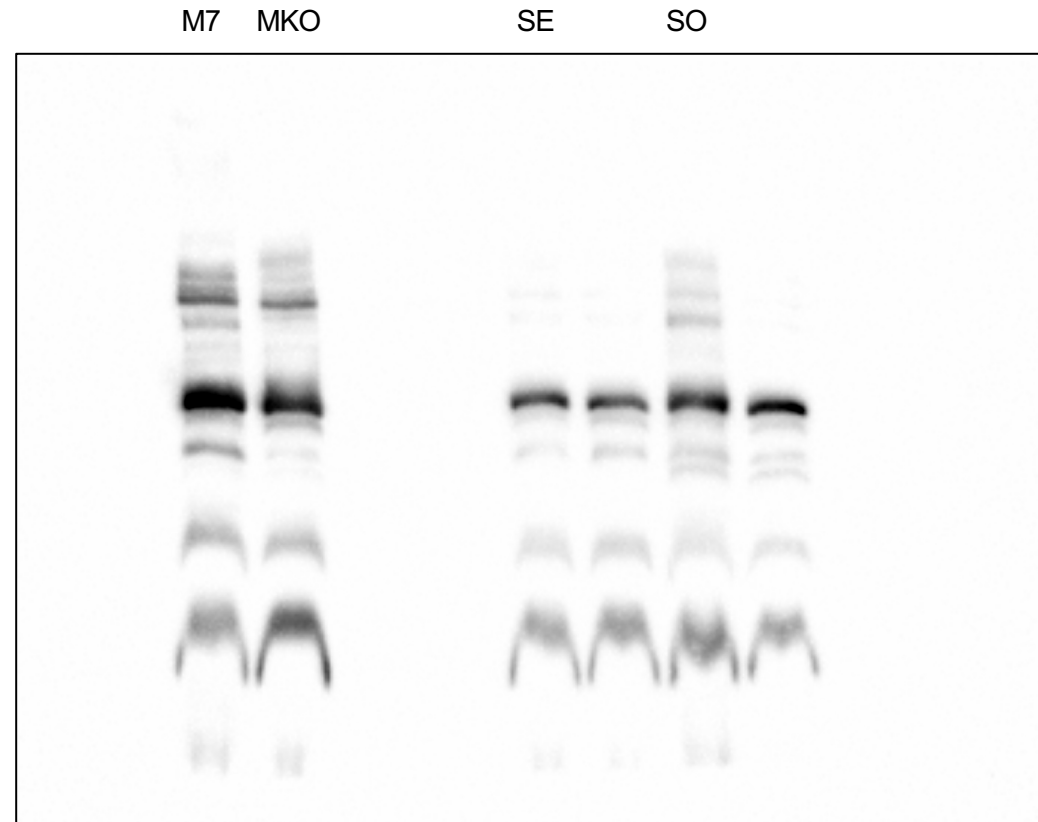

Total OXPHOS Cocktail

Figure 2a,b,c,d

Legend  
M7: MCF7  
MKO: MCF7 *SIM2KO*  
SE: SUM159 *Empty*  
SO: SUM159 *SIM2s-FLAG*

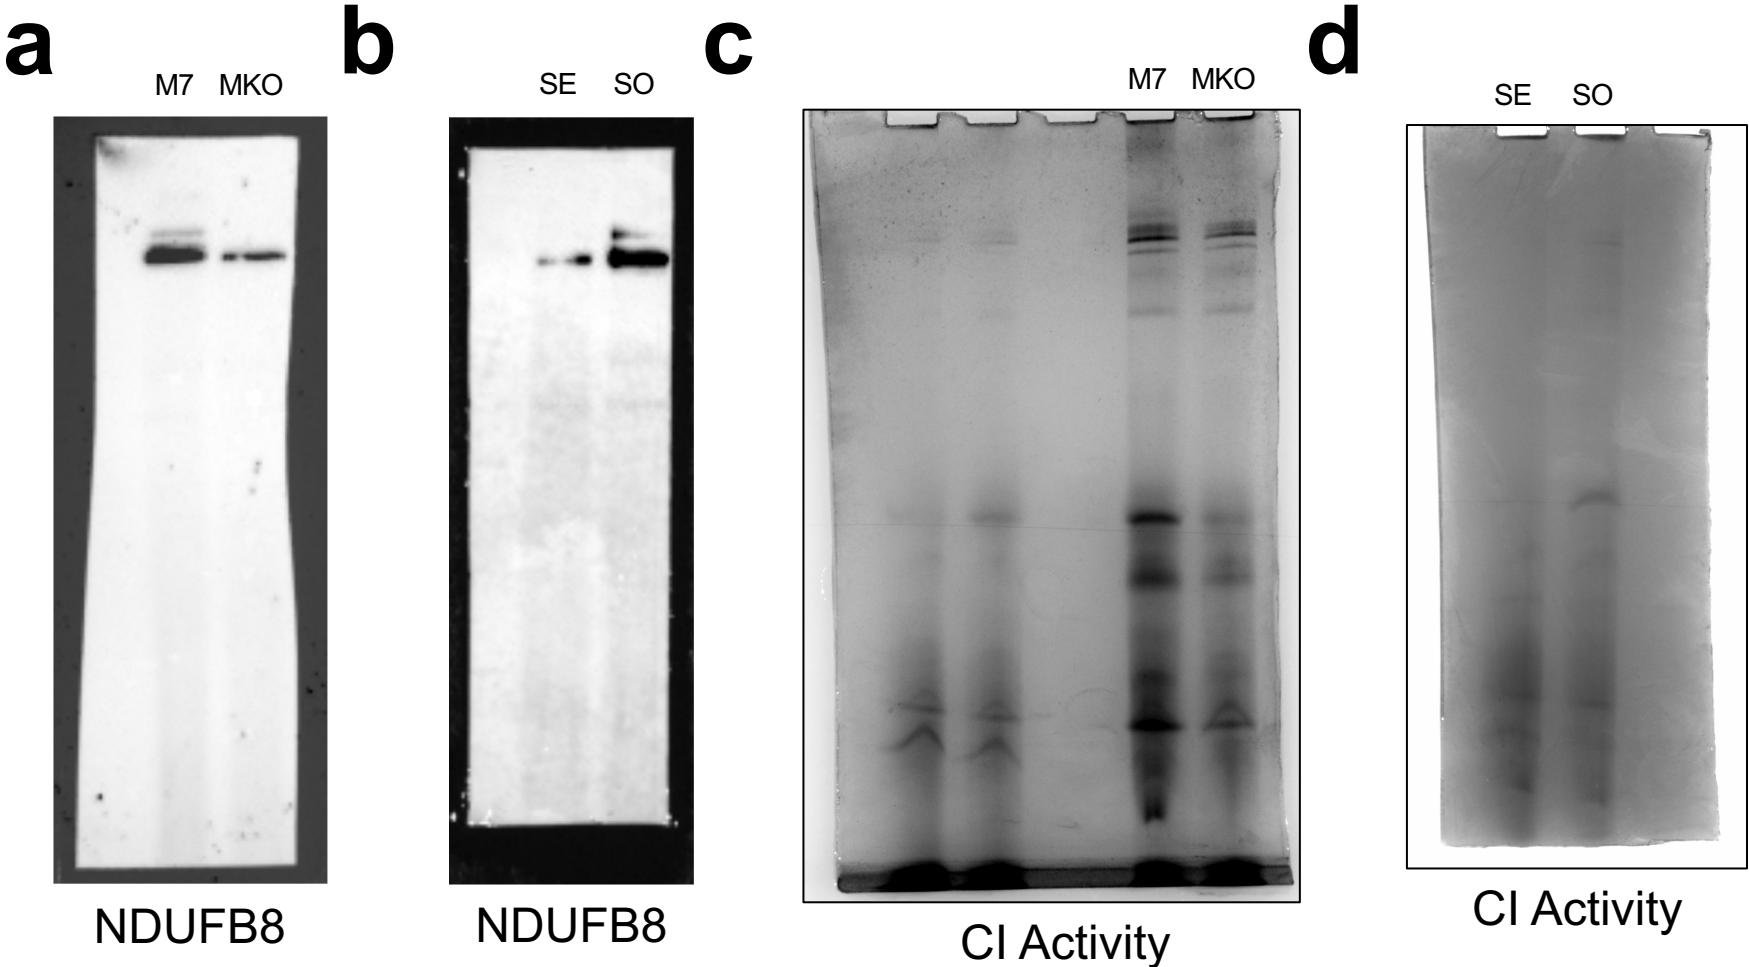

**Figure 2e,f**

Legend

M7: MCF7

MKO: MCF7 *SIM2KO*

SE: SUM159 *Empty*

SO: SUM159 *SIM2s-FLAG*

**e**

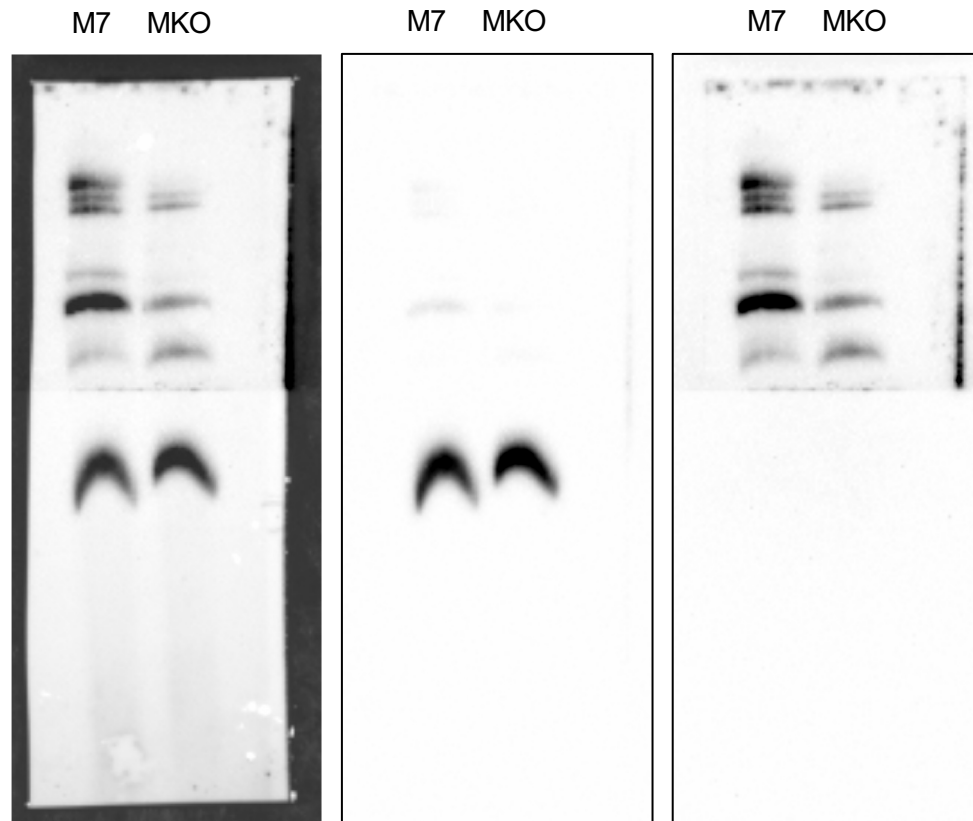

MT-CO2

**f**

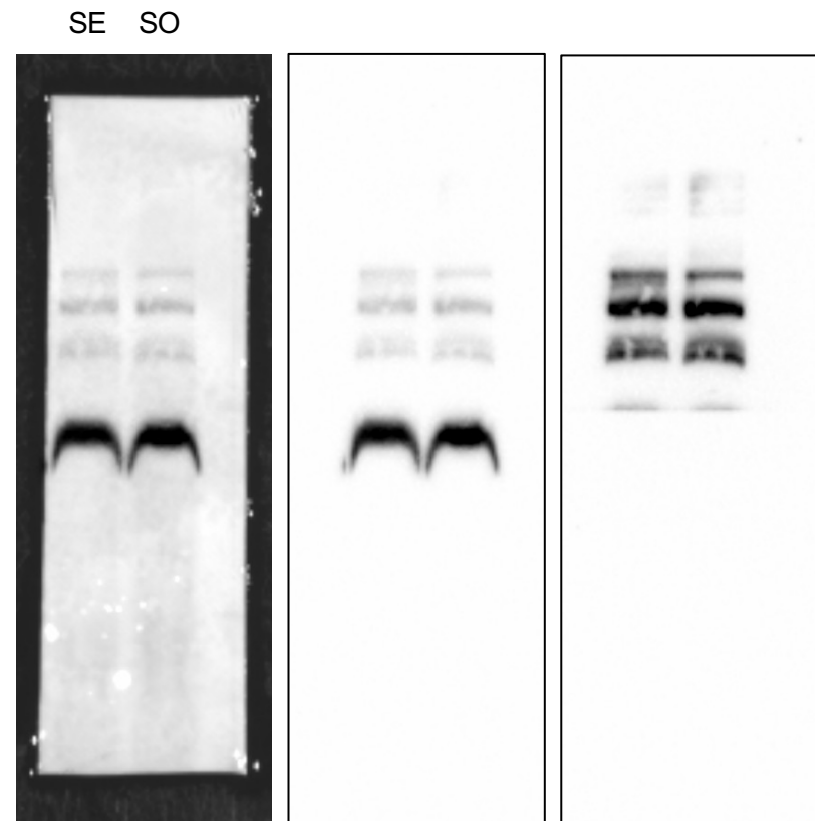

MT-CO2

**Figure 2g,h,i,j**

Legend

M7: MCF7

MKO: MCF7 *SIM2KO*

SE: SUM159 *Empty*

SO: SUM159 *SIM2s-FLAG*

**g**

M7 MKO

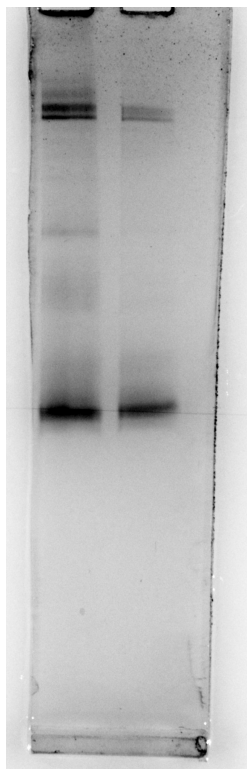

CIV Activity

**h**

SE SO

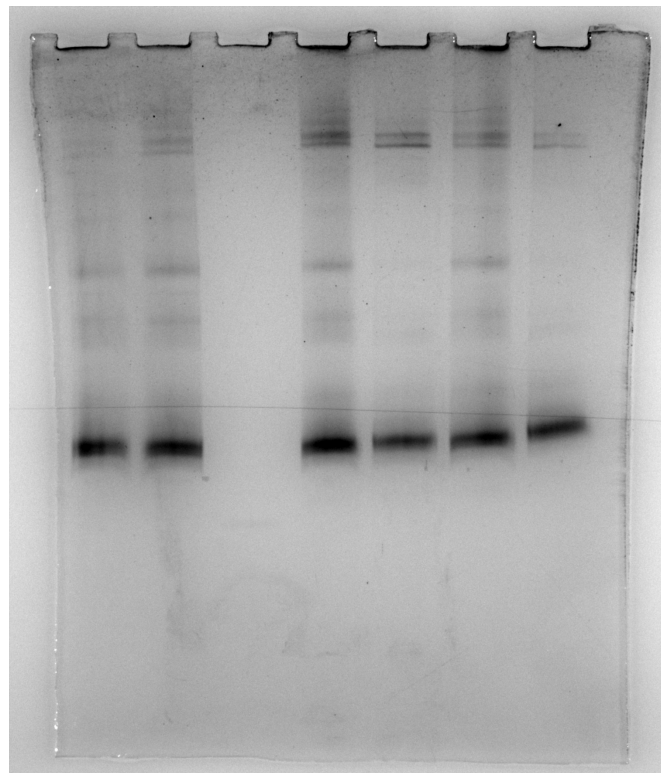

CIV Activity

**i**

M7 MKO

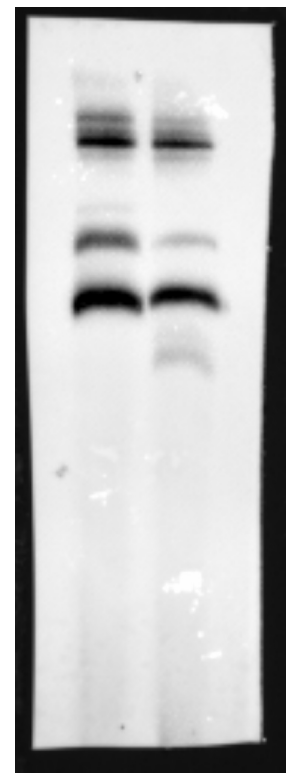

UQCRC2

**j**

SE SO

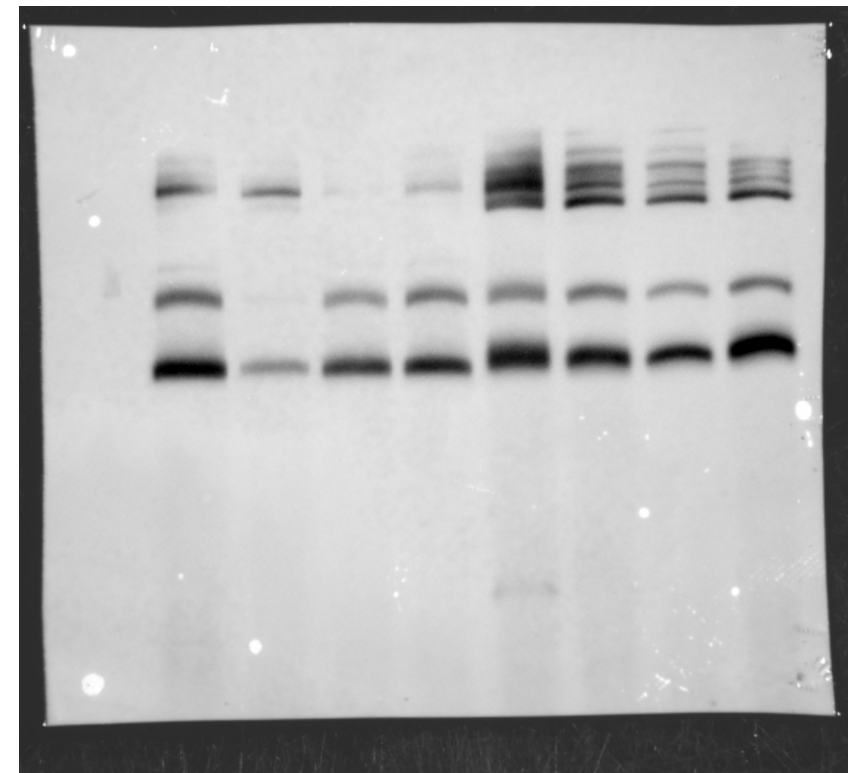

UQCRC2

**Figure 2k,l**

Legend

M7: MCF7

MKO: MCF7 *SIM2KO*

SE: SUM159 *Empty*

SO: SUM159 *SIM2s-FLAG*

**k**

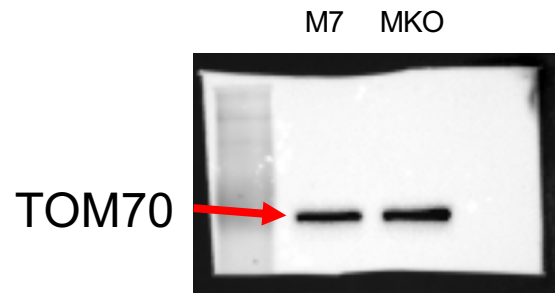

**l**

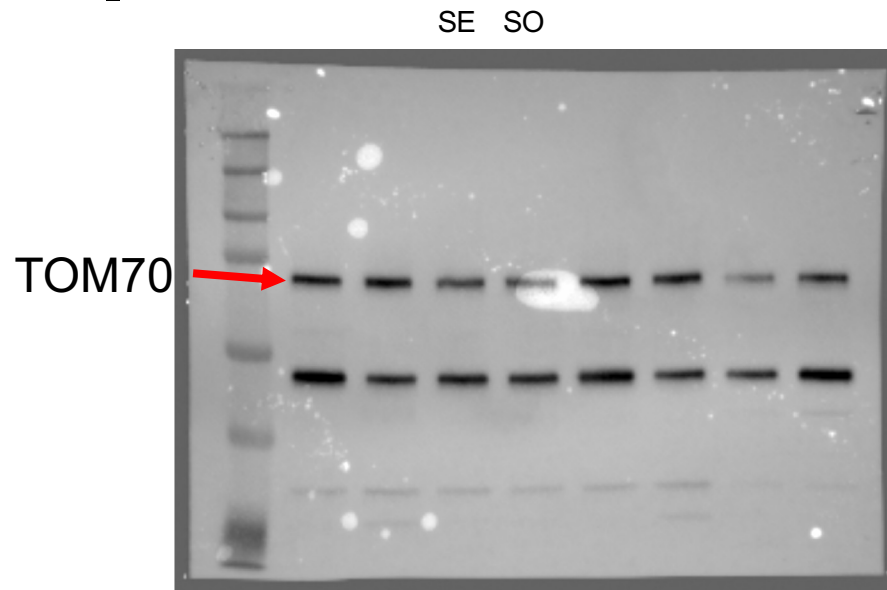



**Figure 3a,c**

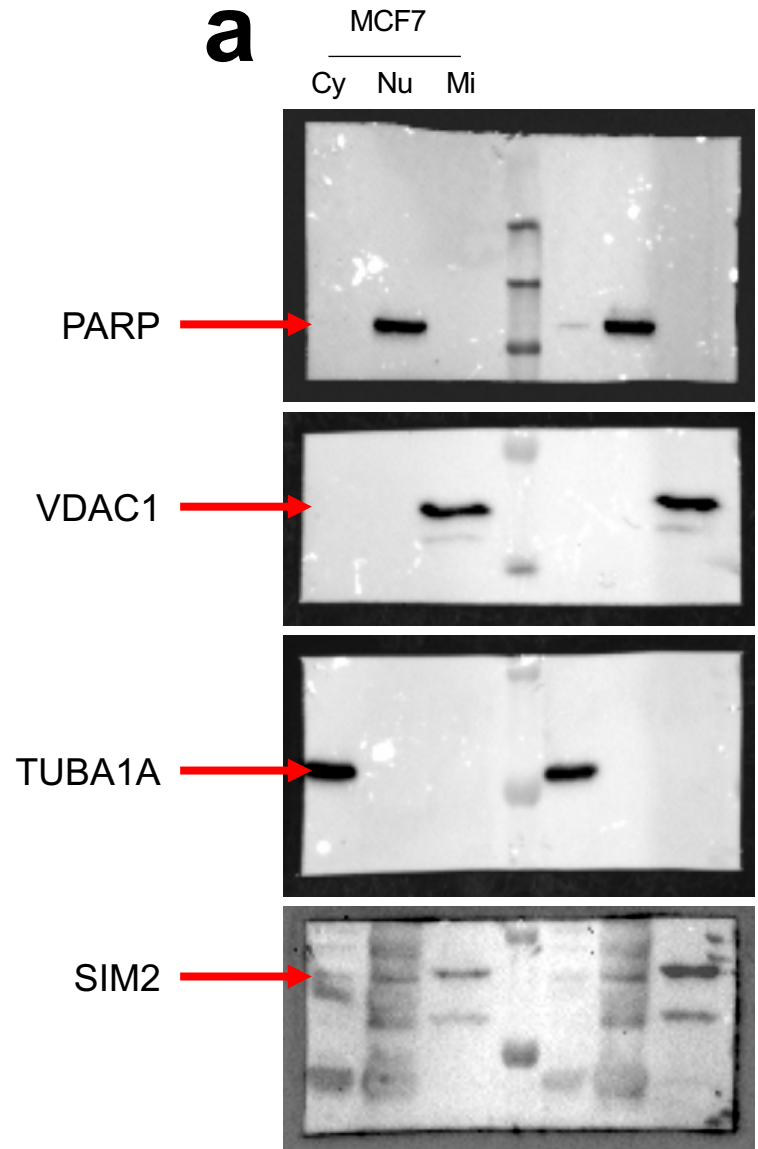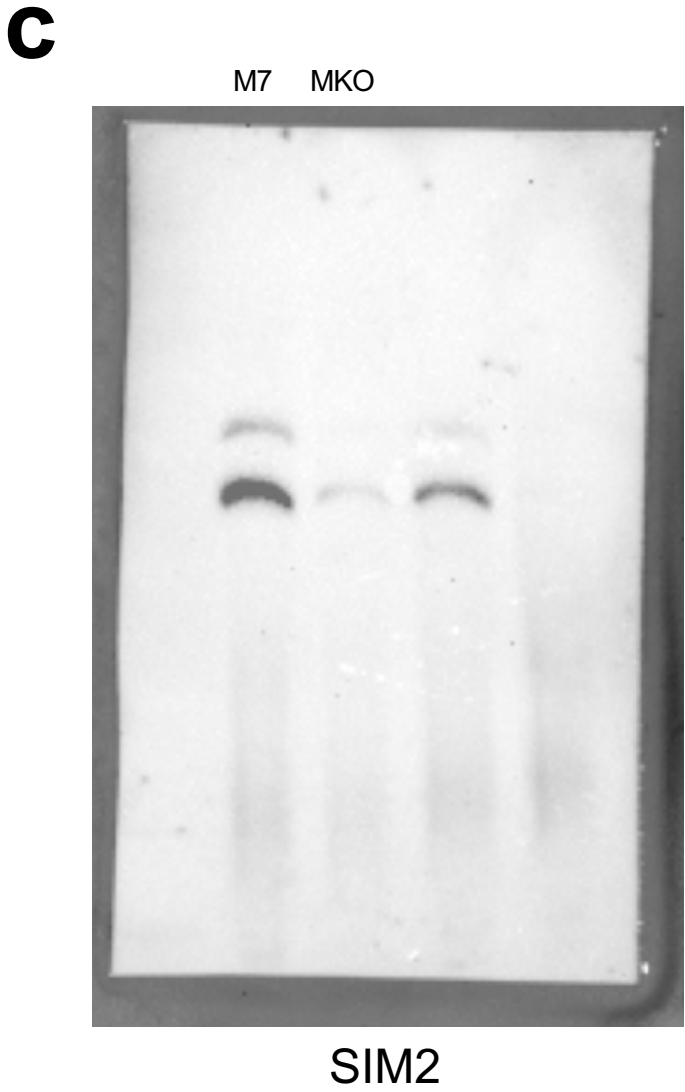

Legend  
M7: MCF7  
MKO: MCF7 *SIM2*KO

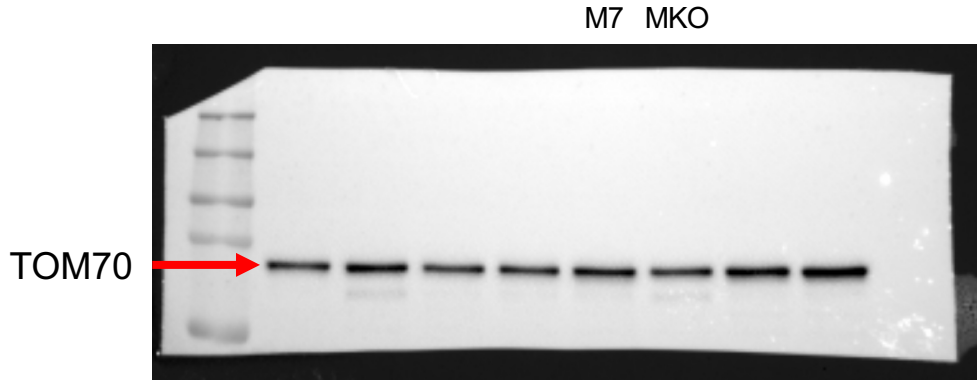

**Figure 3e**

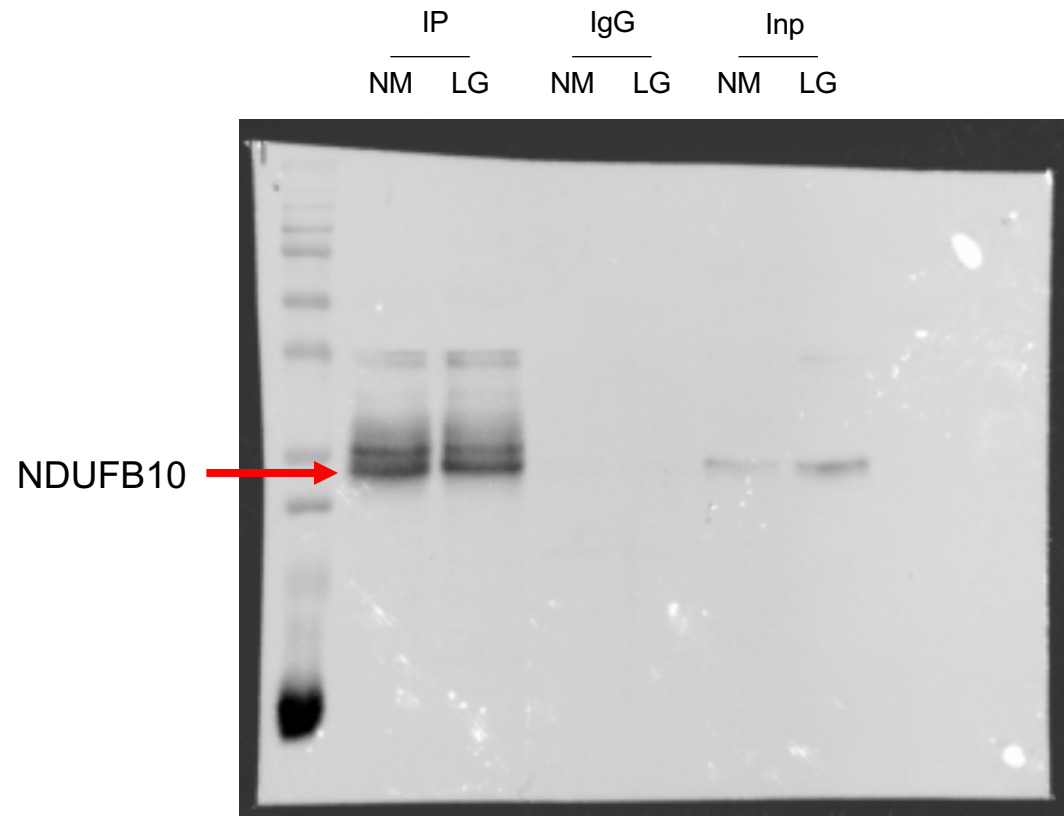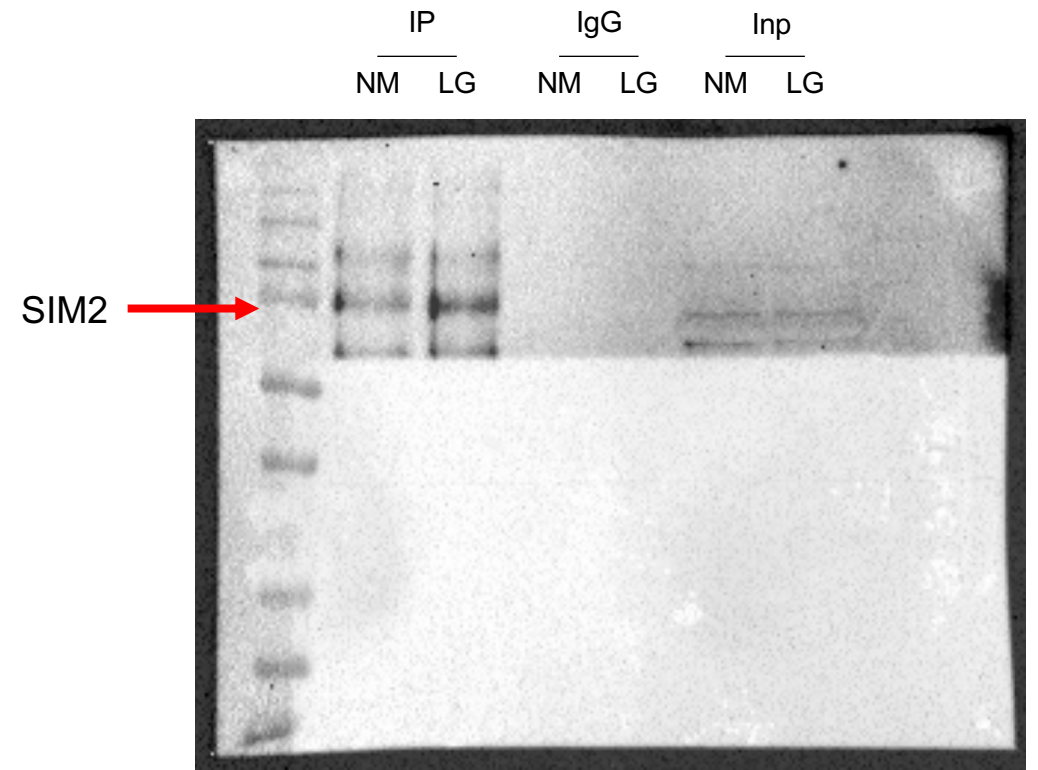

**Figure 4a**

Legend

M7: MCF7

MKO: MCF7 *SIM2*KO

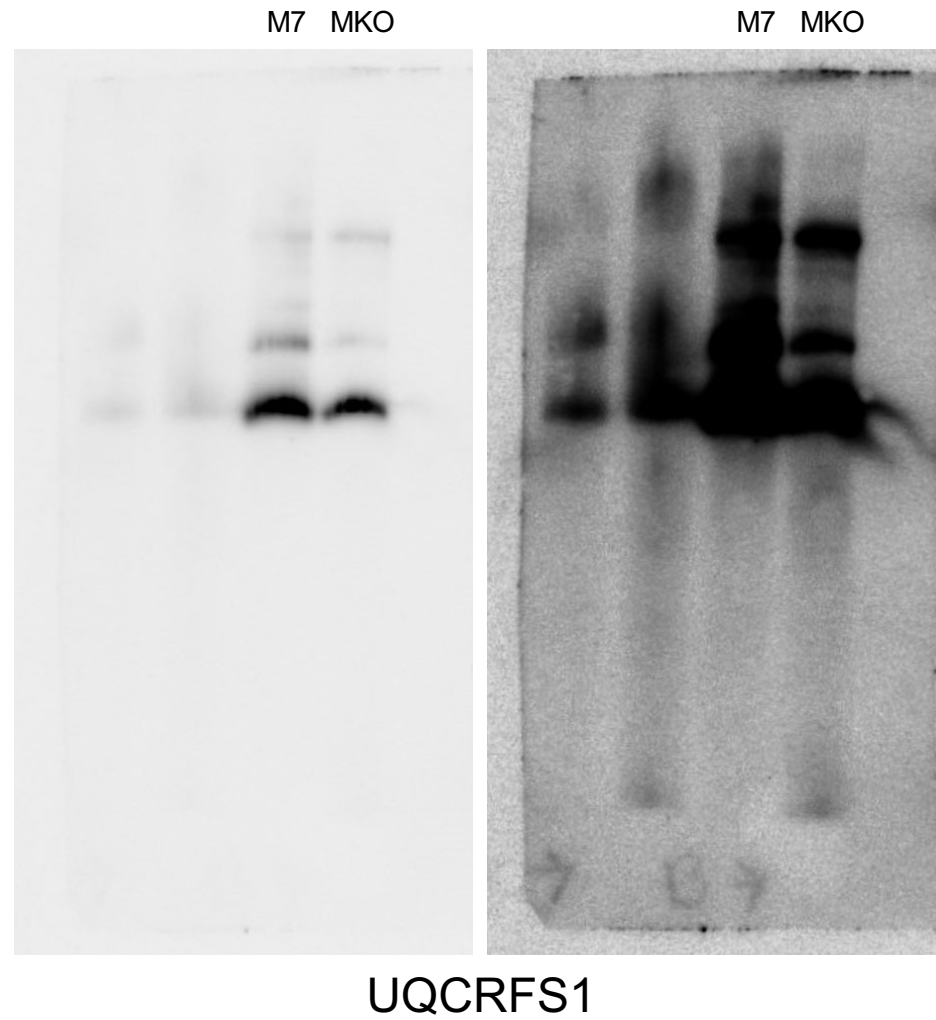

**Figure 4b**

Legend

M7: MCF7

MKO: MCF7 *SIM2KO*

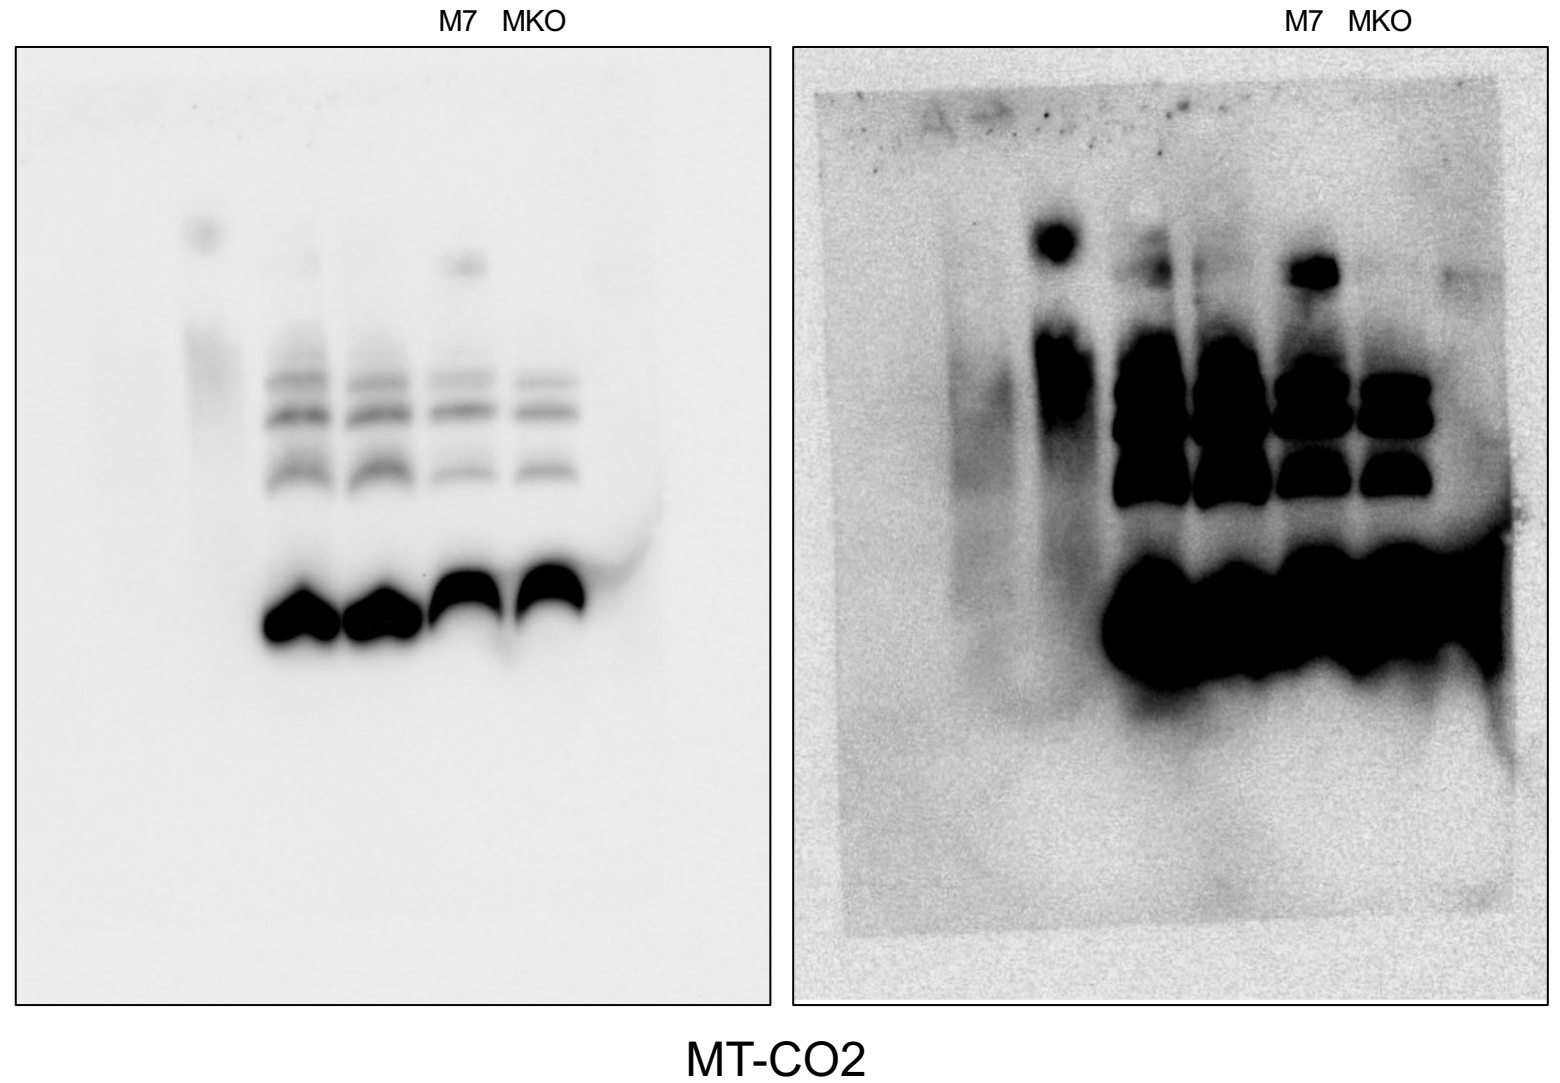

**Figure 4c,d**

Legend

siScr: MCF7 siRNA Scrambled

siCIII.1: MCF7 siRNA *UQCRC2* (#1)

siCIII.2: MCF7 siRNA *UQCRC2* (#2)

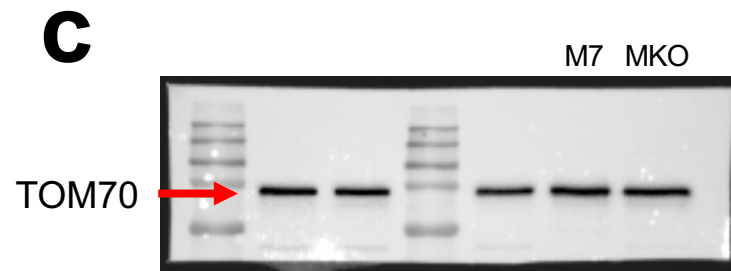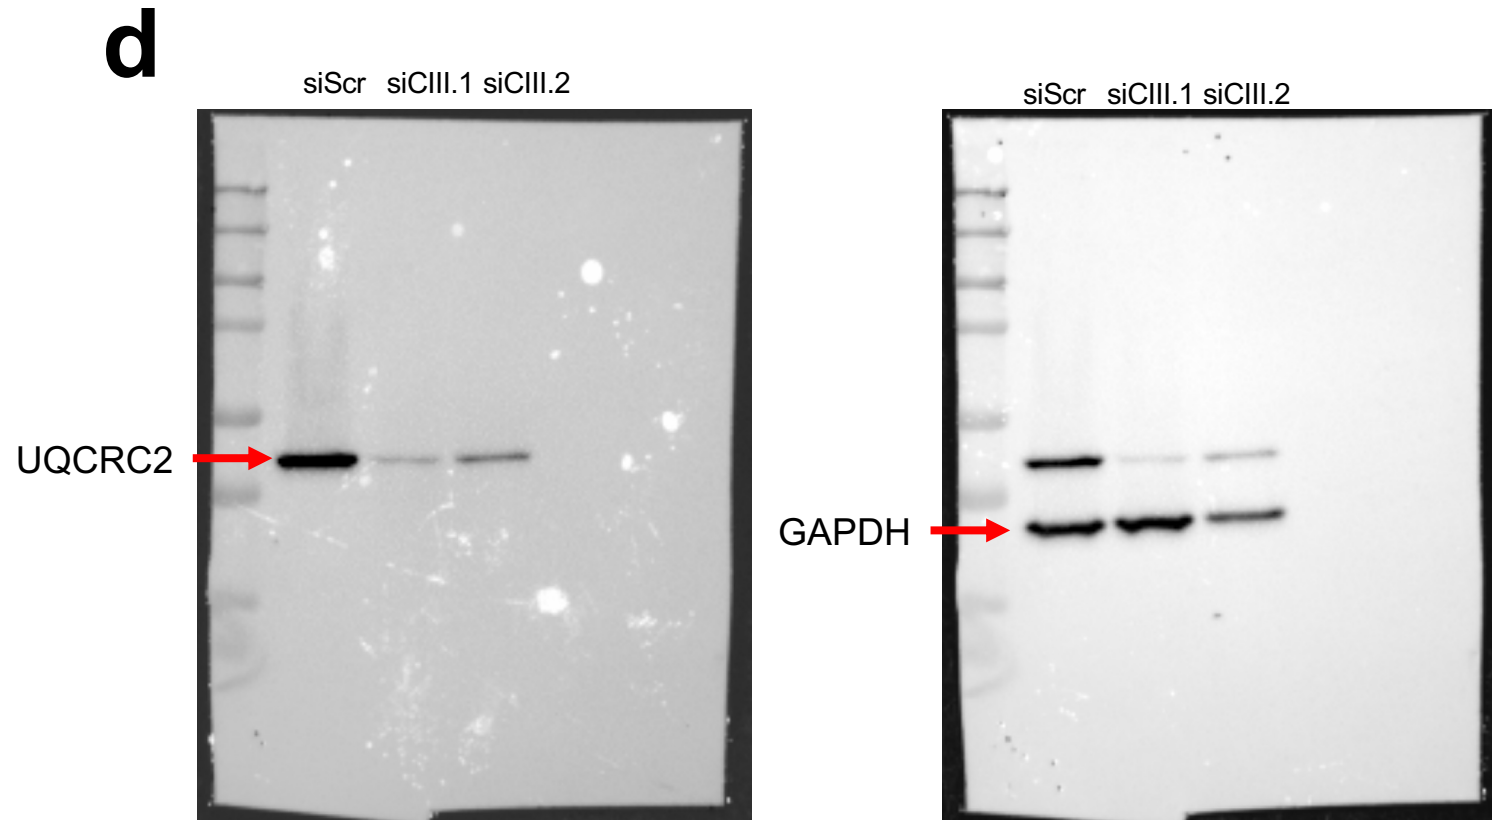

Figure 4h,i,j

Legend

siScr: MCF7 siRNA Scrambled

siCIII.1: MCF7 siRNA *UQCRC2* (#1)

**h**

siScr siCIII.1

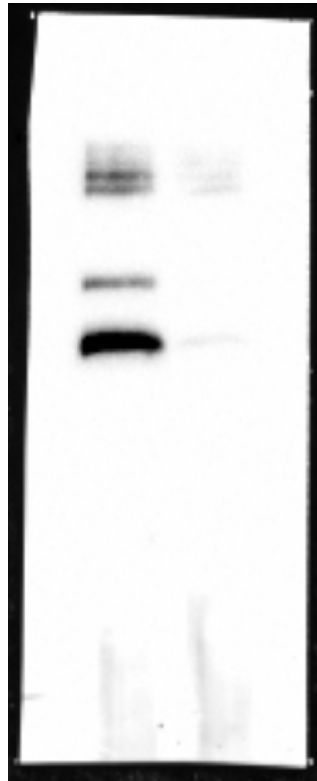

UQCRC2

**i**

siScr siCIII.1

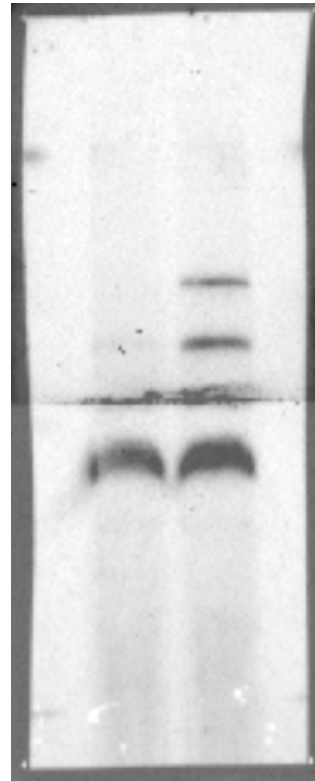

siScr siCIII.1

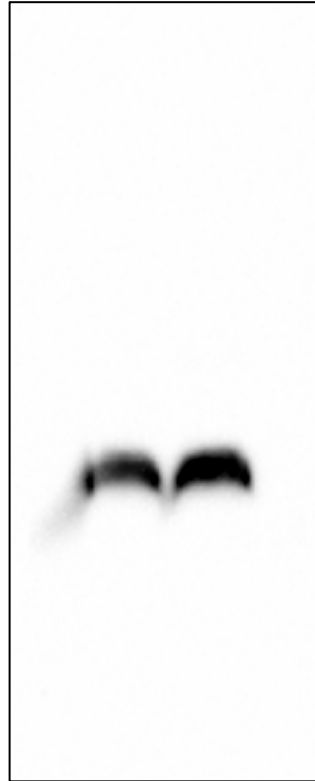

siScr siCIII.1

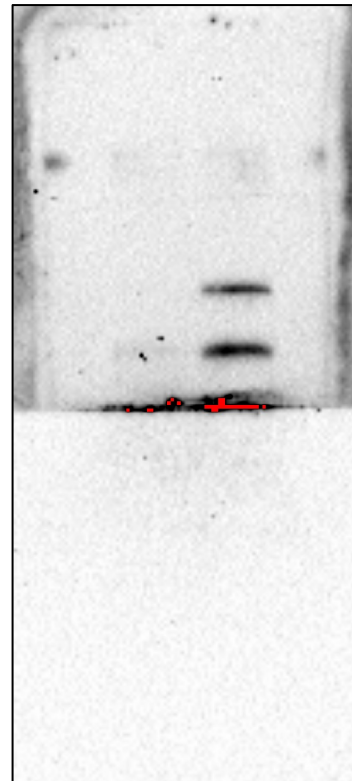

MT-CO2

**j**

siScr siCIII.1

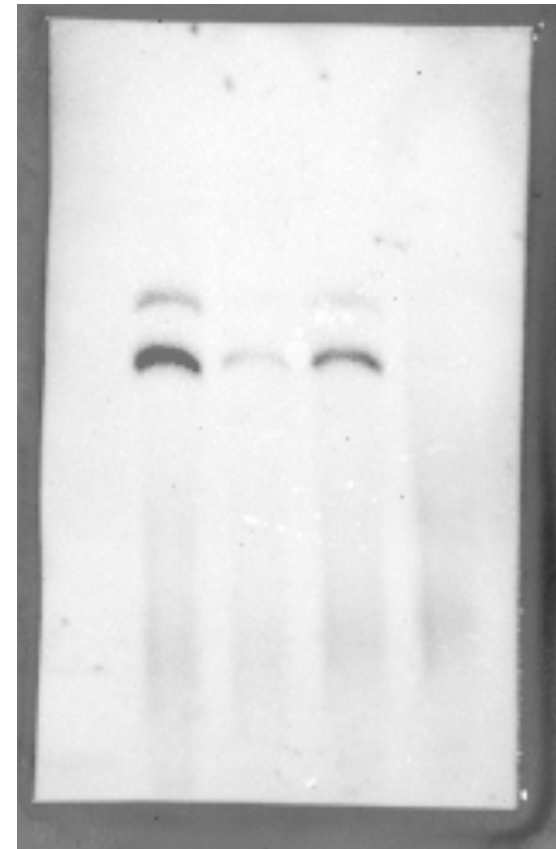

SIM2

**Figure 4k**

Legend

siScr: MCF7 siRNA Scrambled

siCIII.1: MCF7 siRNA *UQCRC2* (#1)

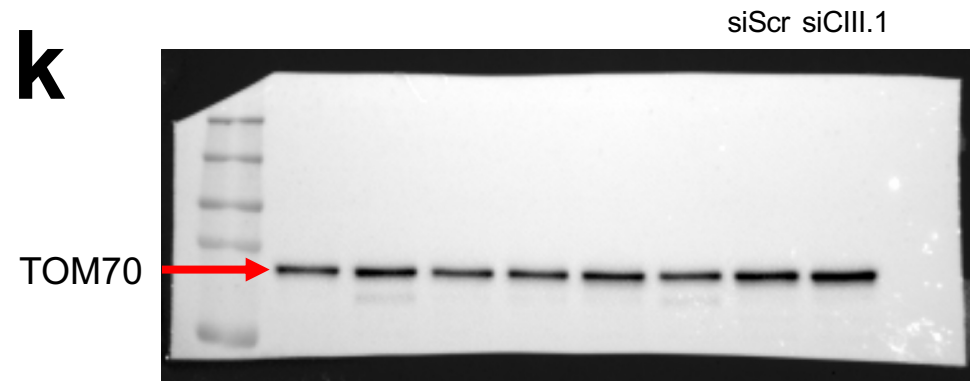

**Figure 5k**

Legend

M7: MCF7

MKO: MCF7 *SIM2KO*

SE: SUM159 *Empty*

SO: SUM159 *SIM2s-FLAG*

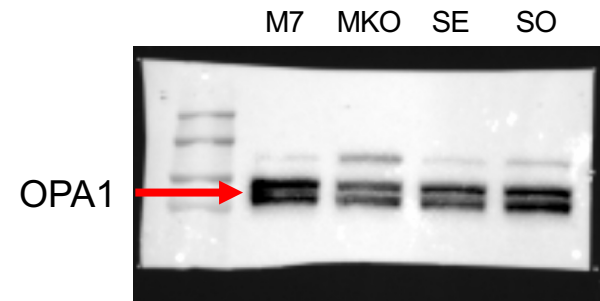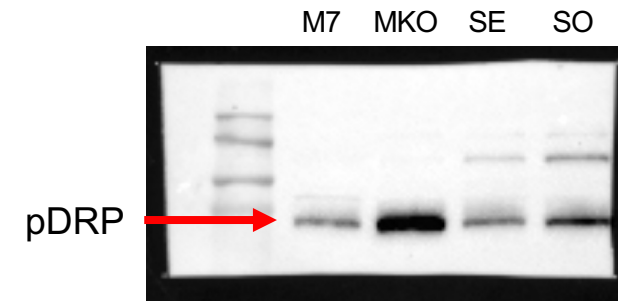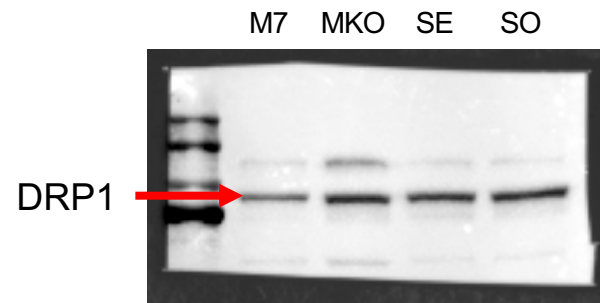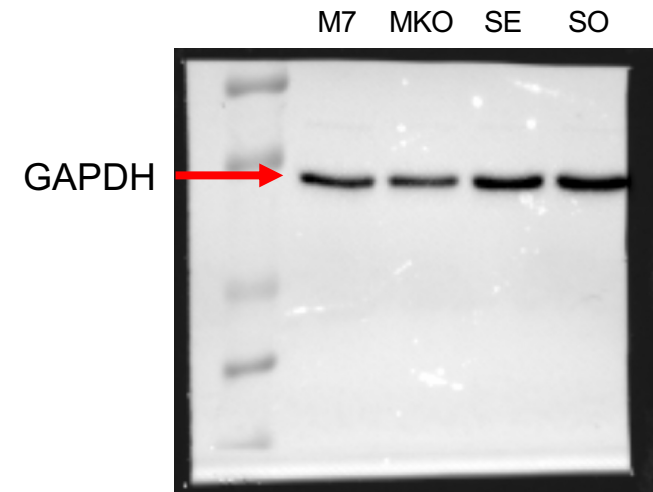



**Figure 6g**

Legend

M7: MCF7

MKO: MCF7 *SIM2KO*

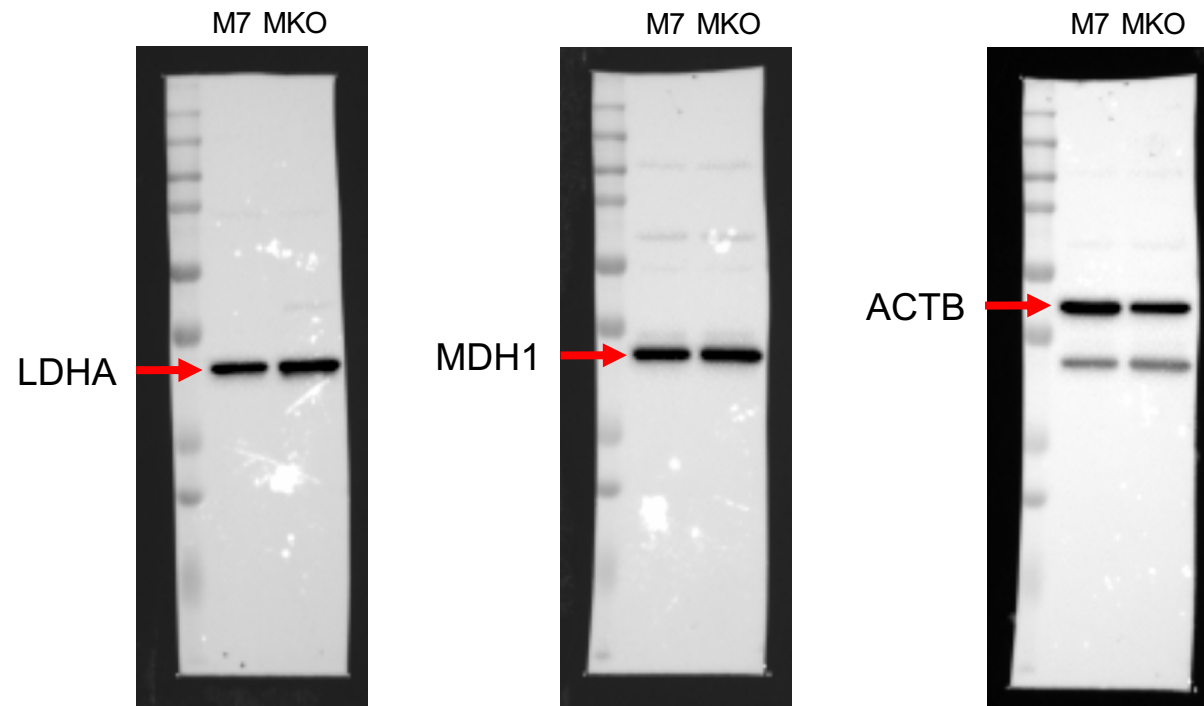

Supplement: 12276_2023_996_MOESM1_ESM.pdf [file 12276_2023_996_MOESM1_ESM.pdf]
